# Supplementary material
Source: publisher figshare collection journal article supplement (https://acs.figshare.com/ndownloader/files/4684213)

Supporting Information:

**Lipoxazolidinones A, B and C: Antibacterial 4-Oxazolidinones from a Marine Actinomycete Isolated from a Guam Marine Sediment**

Venkat R. Macherla\*, Jehnan Liu, Michelle Sunga, Donald J. White, Jennifer Grodberg, Sy Teisan, Kin S. Lam, and Barbara C. M. Potts

*Nereus Pharmaceuticals, Inc., 10480 Wateridge Circle, San Diego, CA 92121*

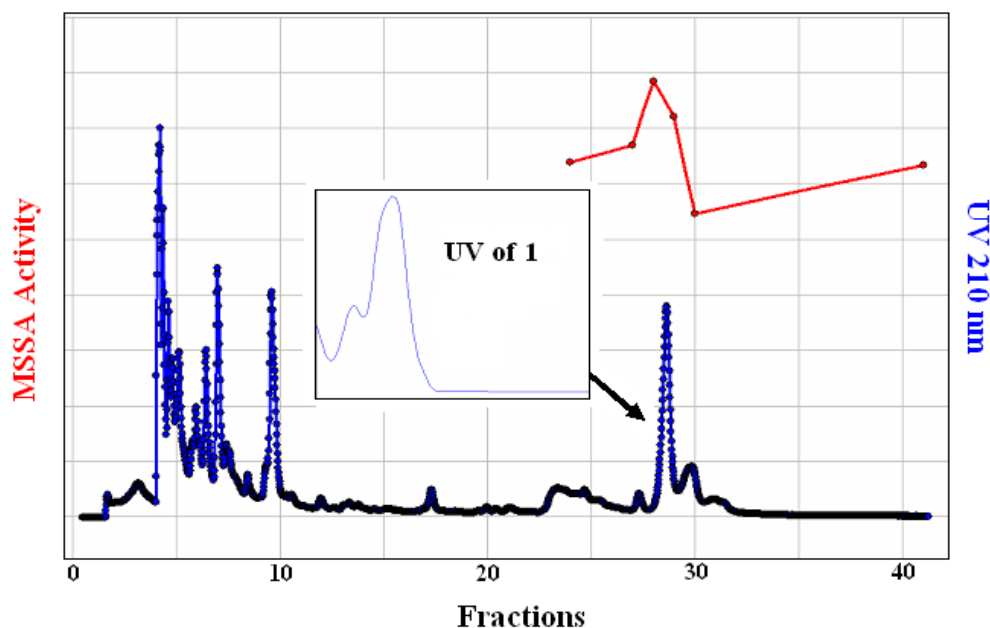

**Figure 1S:** Chromatogram of crude extract eluted into fractions and corresponding biological activity for active fractions. Data shown in blue represent the relative UV absorption (210 nm) acquired during HPLC fractionation (right axis), and the red trace represents the relative % growth inhibition for MSSA (left axis).

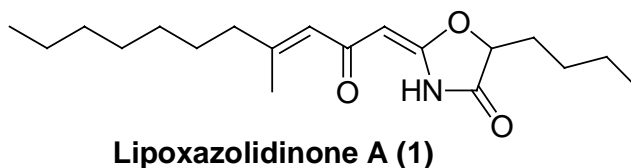

Supplement: Supplementary file 1 [file 4684213]
